# Supplementary material for: Discovery and Evaluation of Thiazinoquinones as Anti-Protozoal Agents
Source: MDPI journal article supplement (doi:10.3390/md11093472), 2013-09-09
Supplement: s1 [file s1]

marinedrugs-11-03472-s001.mol
  corina  12171322293D 1   1.00000     0.00000 
CORINA 3.49 0023  12.04.2013
 38 39  0  0  0  0  0  0  0  0999 V2000
   -0.0168    1.3875    0.0097 C   0  0  0  0  0  0  0  0  0  0  0  0
    0.0021   -0.0041    0.0020 C   0  0  0  0  0  0  0  0  0  0  0  0
    1.2128   -0.6773   -0.0132 C   0  0  0  0  0  0  0  0  0  0  0  0
    2.3989    0.0333   -0.0207 C   0  0  0  0  0  0  0  0  0  0  0  0
    2.3801    1.4154   -0.0131 C   0  0  0  0  0  0  0  0  0  0  0  0
    1.1753    2.0935    0.0021 C   0  0  0  0  0  0  0  0  0  0  0  0
   -1.2028    2.0529    0.0189 O   0  0  0  0  0  0  0  0  0  0  0  0
    3.7150   -0.7007   -0.0367 C   0  0  0  0  0  0  0  0  0  0  0  0
    4.1404   -0.9382   -1.4627 C   0  0  0  0  0  0  0  0  0  0  0  0
    3.4435   -0.5497   -2.3762 O   0  0  0  0  0  0  0  0  0  0  0  0
    5.2953   -1.5823   -1.7231 N   0  0  0  0  0  0  0  0  0  0  0  0
    5.7088   -1.8132   -3.1094 C   0  0  0  0  0  0  0  0  0  0  0  0
    7.0450   -2.5584   -3.1257 C   0  0  0  0  0  0  0  0  0  0  0  0
    7.4769   -2.7995   -4.5735 C   0  0  0  0  0  0  0  0  0  0  0  0
    8.7598   -3.5150   -4.5891 N   0  0  0  0  0  0  0  0  0  0  0  0
    9.2067   -3.7644   -5.9660 C   0  0  0  0  0  0  0  0  0  0  0  0
   10.5428   -4.5096   -5.9415 C   0  0  0  0  0  0  0  0  0  0  0  0
   11.0083   -4.7694   -7.3756 C   0  0  0  0  0  0  0  0  0  0  0  0
   12.3444   -5.5145   -7.3510 C   0  0  0  0  0  0  0  0  0  0  0  0
   12.7913   -5.7640   -8.7280 N   0  0  0  0  0  0  0  0  0  0  0  0
   14.0742   -6.4795   -8.7436 C   0  0  0  0  0  0  0  0  0  0  0  0
   14.5061   -6.7206  -10.1914 C   0  0  0  0  0  0  0  0  0  0  0  0
   15.8423   -7.4658  -10.2076 C   0  0  0  0  0  0  0  0  0  0  0  0
   16.2558   -7.6967  -11.5940 N   0  0  0  0  0  0  0  0  0  0  0  0
   17.4107   -8.3408  -11.8543 C   0  0  0  0  0  0  0  0  0  0  0  0
   19.1709  -10.6944  -13.3035 C   0  0  0  0  0  0  0  0  0  0  0  0
   19.1522   -9.3123  -13.2964 C   0  0  0  0  0  0  0  0  0  0  0  0
   17.8361   -8.5783  -13.2804 C   0  0  0  0  0  0  0  0  0  0  0  0
   20.3758  -11.3725  -13.3183 C   0  0  0  0  0  0  0  0  0  0  0  0
   21.5679  -10.6665  -13.3258 C   0  0  0  0  0  0  0  0  0  0  0  0
   21.5490   -9.2749  -13.3181 C   0  0  0  0  0  0  0  0  0  0  0  0
   20.3382   -8.6017  -13.3034 C   0  0  0  0  0  0  0  0  0  0  0  0
   22.7538  -11.3319  -13.3399 O   0  0  0  0  0  0  0  0  0  0  0  0
   18.1076   -8.7293  -10.9409 O   0  0  0  0  0  0  0  0  0  0  0  0
   -1.1654   -0.7015    0.0099 O   0  0  0  0  0  0  0  0  0  0  0  0
   -1.0695   -2.1272    0.0013 C   0  0  0  0  0  0  0  0  0  0  0  0
   22.7165   -8.5775  -13.3251 O   0  0  0  0  0  0  0  0  0  0  0  0
   22.6206   -7.1518  -13.3165 C   0  0  0  0  0  0  0  0  0  0  0  0
  1  2  2  0      
  2  3  1  0      
  3  4  2  0      
  4  5  1  0      
  5  6  2  0      
  6  1  1  0      
  1  7  1  0      
  4  8  1  0      
  8  9  1  0      
  9 10  2  0      
  9 11  1  0      
 11 12  1  0      
 12 13  1  0      
 13 14  1  0      
 14 15  1  0      
 15 16  1  0      
 16 17  1  0      
 17 18  1  0      
 18 19  1  0      
 19 20  1  0      
 20 21  1  0      
 21 22  1  0      
 22 23  1  0      
 23 24  1  0      
 24 25  1  0      
 26 27  2  0      
 27 28  1  0      
 28 25  1  0      
 26 29  1  0      
 29 30  2  0      
 30 31  1  0      
 31 32  2  0      
 32 27  1  0      
 30 33  1  0      
 25 34  2  0      
  2 35  1  0      
 35 36  1  0      
 37 38  1  0      
 31 37  1  0      
M  STY  1   1 SUP
M  SLB  1   1   1
M  SAL   1  2  35  36
M  SBL   1  1  36
M  SMT   1 OMe
M  SBV   1 36   -9.7261    6.6822
M  STY  1   2 SUP
M  SLB  1   2   2
M  SAL   2  2  37  38
M  SBL   2  1  39
M  SMT   2 OMe
M  SBV   2 39   -9.0108    7.0939
M  END
$$$$
