# Supplementary material for: Discovery and Evaluation of Thiazinoquinones as Anti-Protozoal Agents
Source: MDPI journal article supplement (doi:10.3390/md11093472), 2013-09-09
Supplement: s2 [file s2]

marinedrugs-11-03472-s001.mol
  ChemDraw12181311272D

 38 39  0  0  0  0  0  0  0  0999 V2000
   -8.4576    1.0310    0.0000 C   0  0  0  0  0  0  0  0  0  0  0  0
   -8.4576    0.2060    0.0000 C   0  0  0  0  0  0  0  0  0  0  0  0
   -7.7431   -0.2065    0.0000 C   0  0  0  0  0  0  0  0  0  0  0  0
   -7.0286    0.2060    0.0000 C   0  0  0  0  0  0  0  0  0  0  0  0
   -7.0286    1.0310    0.0000 C   0  0  0  0  0  0  0  0  0  0  0  0
   -7.7431    1.4435    0.0000 C   0  0  0  0  0  0  0  0  0  0  0  0
   -9.1721    1.4435    0.0000 O   0  0  0  0  0  0  0  0  0  0  0  0
   -6.3142   -0.2065    0.0000 C   0  0  0  0  0  0  0  0  0  0  0  0
   -5.5998    0.2060    0.0000 C   0  0  0  0  0  0  0  0  0  0  0  0
   -5.5998    1.0310    0.0000 O   0  0  0  0  0  0  0  0  0  0  0  0
   -4.8862   -0.2060    0.0000 N   0  0  0  0  0  0  0  0  0  0  0  0
   -4.1717    0.2065    0.0000 C   0  0  0  0  0  0  0  0  0  0  0  0
   -3.4573   -0.2060    0.0000 C   0  0  0  0  0  0  0  0  0  0  0  0
   -2.7429    0.2065    0.0000 C   0  0  0  0  0  0  0  0  0  0  0  0
   -2.0284   -0.2060    0.0000 N   0  0  0  0  0  0  0  0  0  0  0  0
   -1.3148    0.2060    0.0000 C   0  0  0  0  0  0  0  0  0  0  0  0
   -0.6004   -0.2065    0.0000 C   0  0  0  0  0  0  0  0  0  0  0  0
    0.1141    0.2060    0.0000 C   0  0  0  0  0  0  0  0  0  0  0  0
    0.8285   -0.2065    0.0000 C   0  0  0  0  0  0  0  0  0  0  0  0
    1.5429    0.2060    0.0000 N   0  0  0  0  0  0  0  0  0  0  0  0
    2.2565   -0.2060    0.0000 C   0  0  0  0  0  0  0  0  0  0  0  0
    2.9710    0.2065    0.0000 C   0  0  0  0  0  0  0  0  0  0  0  0
    3.6854   -0.2060    0.0000 C   0  0  0  0  0  0  0  0  0  0  0  0
    4.3998    0.2065    0.0000 N   0  0  0  0  0  0  0  0  0  0  0  0
    5.1143   -0.2060    0.0000 C   0  0  0  0  0  0  0  0  0  0  0  0
    6.5433   -1.0310    0.0000 C   0  0  0  0  0  0  0  0  0  0  0  0
    6.5433   -0.2060    0.0000 C   0  0  0  0  0  0  0  0  0  0  0  0
    5.8288    0.2065    0.0000 C   0  0  0  0  0  0  0  0  0  0  0  0
    7.2576   -1.4435    0.0000 C   0  0  0  0  0  0  0  0  0  0  0  0
    7.9721   -1.0310    0.0000 C   0  0  0  0  0  0  0  0  0  0  0  0
    7.9721   -0.2060    0.0000 C   0  0  0  0  0  0  0  0  0  0  0  0
    7.2576    0.2065    0.0000 C   0  0  0  0  0  0  0  0  0  0  0  0
    8.6866   -1.4435    0.0000 O   0  0  0  0  0  0  0  0  0  0  0  0
    5.1143   -1.0310    0.0000 O   0  0  0  0  0  0  0  0  0  0  0  0
   -8.4589    0.2073    0.0000 O   0  0  0  0  0  0  0  0  0  0  0  0
   -7.7445   -0.2052    0.0000 C   0  0  0  0  0  0  0  0  0  0  0  0
    8.6861    0.2071    0.0000 O   0  0  0  0  0  0  0  0  0  0  0  0
    9.1721   -0.0735    0.0000 C   0  0  0  0  0  0  0  0  0  0  0  0
  1  2  2  0      
  2  3  1  0      
  3  4  2  0      
  4  5  1  0      
  5  6  2  0      
  6  1  1  0      
  1  7  1  0      
  4  8  1  0      
  8  9  1  0      
  9 10  2  0      
  9 11  1  0      
 11 12  1  0      
 12 13  1  0      
 13 14  1  0      
 14 15  1  0      
 15 16  1  0      
 16 17  1  0      
 17 18  1  0      
 18 19  1  0      
 19 20  1  0      
 20 21  1  0      
 21 22  1  0      
 22 23  1  0      
 23 24  1  0      
 24 25  1  0      
 26 27  2  0      
 27 28  1  0      
 28 25  1  0      
 26 29  1  0      
 29 30  2  0      
 30 31  1  0      
 31 32  2  0      
 32 27  1  0      
 30 33  1  0      
 25 34  2  0      
  2 35  1  0      
 35 36  1  0      
 37 38  1  0      
 31 37  1  0      
M  STY  1   1 SUP
M  SLB  1   1   1
M  SAL   1  2  35  36
M  SBL   1  1  36
M  SMT   1 OMe
M  SBV   1 36   -9.7261    6.6822
M  STY  1   2 SUP
M  SLB  1   2   2
M  SAL   2  2  37  38
M  SBL   2  1  39
M  SMT   2 OMe
M  SBV   2 39   -9.0108    7.0939
M  END
