# Supplementary material for: Discovery and Evaluation of Thiazinoquinones as Anti-Protozoal Agents
Source: MDPI journal article supplement (doi:10.3390/md11093472), 2013-09-09
Supplement: s3 [file s3]

marinedrugs-11-03472-s002.mol
  corina  12171322293D 1   1.00000     0.00000 
CORINA 3.49 0023  12.04.2013
 21 23  0  0  0  0  0  0  0  0999 V2000
   -0.0188    1.5338    0.0105 C   0  0  0  0  0  0  0  0  0  0  0  0
    0.0021   -0.0041    0.0020 C   0  0  0  0  0  0  0  0  0  0  0  0
    0.6144   -0.4494   -1.2438 N   0  0  0  0  0  0  0  0  0  0  0  0
    1.8550   -0.0484   -1.6762 C   0  0  0  0  0  0  0  0  0  0  0  0
    2.4709    1.0682   -1.2258 C   0  0  0  0  0  0  0  0  0  0  0  0
    1.7114    2.0935   -0.0030 S   0  0  0  0  0  0  0  0  0  0  0  0
    2.5265   -0.9088   -2.6927 C   0  0  0  0  0  0  0  0  0  0  0  0
    3.8581   -0.5384   -3.2240 C   0  0  0  0  0  0  0  0  0  0  0  0
    4.4769    0.6324   -2.7508 C   0  0  0  0  0  0  0  0  0  0  0  0
    3.7875    1.4598   -1.7375 C   0  0  0  0  0  0  0  0  0  0  0  0
    4.3173    2.4739   -1.3253 O   0  0  0  0  0  0  0  0  0  0  0  0
    1.9789   -1.9177   -3.0862 O   0  0  0  0  0  0  0  0  0  0  0  0
    4.4579   -1.2923   -4.1277 N   0  0  0  0  0  0  0  0  0  0  0  0
    5.6494   -0.9767   -4.6163 C   0  0  0  0  0  0  0  0  0  0  0  0
    6.3207    0.1701   -4.1929 C   0  0  0  0  0  0  0  0  0  0  0  0
    5.7275    0.9927   -3.2434 C   0  0  0  0  0  0  0  0  0  0  0  0
    1.8088    3.4080   -0.5340 O   0  0  0  0  0  0  0  0  0  0  0  0
    2.3620    1.7386    1.2094 O   0  0  0  0  0  0  0  0  0  0  0  0
    6.2785   -1.8573   -5.6287 C   0  0  0  0  0  0  0  0  0  0  0  0
    7.3693   -1.5778   -6.0827 O   0  0  0  0  0  0  0  0  0  0  0  0
    5.6403   -2.9676   -6.0451 O   0  0  0  0  0  0  0  0  0  0  0  0
  1  2  1  0      
  2  3  1  0      
  3  4  1  0      
  4  5  2  0      
  5  6  1  0      
  6  1  1  0      
  4  7  1  0      
  7  8  1  0      
  8  9  2  0      
  9 10  1  0      
 10  5  1  0      
 10 11  2  0      
  7 12  2  0      
  8 13  1  0      
 13 14  2  0      
 14 15  1  0      
 15 16  2  0      
 16  9  1  0      
  6 17  2  0      
  6 18  2  0      
 14 19  1  0      
 19 20  2  0      
 19 21  1  0      
M  STY  1   1 SUP
M  SLB  1   1   1
M  SAL   1  3  19  20  21
M  SBL   1  1  21
M  SMT   1 CO2H
M  SBV   1 21   -5.0807    4.2069
M  END
$$$$
