# Supplementary material for: Discovery and Evaluation of Thiazinoquinones as Anti-Protozoal Agents
Source: MDPI journal article supplement (doi:10.3390/md11093472), 2013-09-09
Supplement: s4 [file s4]

marinedrugs-11-03472-s002.mol
  ChemDraw12031316282D

 21 23  0  0  0  0  0  0  0  0999 V2000
   -2.5001    0.4125    0.0000 C   0  0  0  0  0  0  0  0  0  0  0  0
   -2.5001   -0.4125    0.0000 C   0  0  0  0  0  0  0  0  0  0  0  0
   -1.7857   -0.8250    0.0000 N   0  0  0  0  0  0  0  0  0  0  0  0
   -1.0712   -0.4125    0.0000 C   0  0  0  0  0  0  0  0  0  0  0  0
   -1.0712    0.4125    0.0000 C   0  0  0  0  0  0  0  0  0  0  0  0
   -1.7857    0.8250    0.0000 S   0  0  0  0  0  0  0  0  0  0  0  0
   -0.3567   -0.8250    0.0000 C   0  0  0  0  0  0  0  0  0  0  0  0
    0.3577   -0.4125    0.0000 C   0  0  0  0  0  0  0  0  0  0  0  0
    0.3577    0.4125    0.0000 C   0  0  0  0  0  0  0  0  0  0  0  0
   -0.3567    0.8250    0.0000 C   0  0  0  0  0  0  0  0  0  0  0  0
   -0.3567    1.6500    0.0000 O   0  0  0  0  0  0  0  0  0  0  0  0
   -0.3567   -1.6500    0.0000 O   0  0  0  0  0  0  0  0  0  0  0  0
    1.0722   -0.8250    0.0000 N   0  0  0  0  0  0  0  0  0  0  0  0
    1.7867   -0.4125    0.0000 C   0  0  0  0  0  0  0  0  0  0  0  0
    1.7867    0.4125    0.0000 C   0  0  0  0  0  0  0  0  0  0  0  0
    1.0722    0.8250    0.0000 C   0  0  0  0  0  0  0  0  0  0  0  0
   -2.3690    1.4084    0.0000 O   0  0  0  0  0  0  0  0  0  0  0  0
   -1.2023    1.4084    0.0000 O   0  0  0  0  0  0  0  0  0  0  0  0
    2.5001   -1.2364    0.0000 C   0  0  0  0  0  0  0  0  0  0  0  0
    2.5001   -0.4114    0.0000 O   0  0  0  0  0  0  0  0  0  0  0  0
    1.7856   -1.6489    0.0000 O   0  0  0  0  0  0  0  0  0  0  0  0
  1  2  1  0      
  2  3  1  0      
  3  4  1  0      
  4  5  2  0      
  5  6  1  0      
  6  1  1  0      
  4  7  1  0      
  7  8  1  0      
  8  9  2  0      
  9 10  1  0      
 10  5  1  0      
 10 11  2  0      
  7 12  2  0      
  8 13  1  0      
 13 14  2  0      
 14 15  1  0      
 15 16  2  0      
 16  9  1  0      
  6 17  2  0      
  6 18  2  0      
 14 19  1  0      
 19 20  2  0      
 19 21  1  0      
M  STY  1   1 SUP
M  SLB  1   1   1
M  SAL   1  3  19  20  21
M  SBL   1  1  21
M  SMT   1 CO2H
M  SBV   1 21   -5.0807    4.2069
M  END
