# Supplementary material for: Discovery and Evaluation of Thiazinoquinones as Anti-Protozoal Agents
Source: MDPI journal article supplement (doi:10.3390/md11093472), 2013-09-09
Supplement: s5 [file s5]

marinedrugs-11-03472-s003.mol
  corina  12171322293D 1   1.00000     0.00000 
CORINA 3.49 0023  12.04.2013
 21 23  0  0  0  0  0  0  0  0999 V2000
   -0.0158    1.3159    0.0093 C   0  0  0  0  0  0  0  0  0  0  0  0
    0.0021   -0.0041    0.0020 C   0  0  0  0  0  0  0  0  0  0  0  0
    1.1505   -0.7488   -0.0019 N   0  0  0  0  0  0  0  0  0  0  0  0
    2.3927   -0.3436   -0.4062 C   0  0  0  0  0  0  0  0  0  0  0  0
    2.7342    0.9702   -0.4567 C   0  0  0  0  0  0  0  0  0  0  0  0
    1.5267    2.1785   -0.0008 S   0  0  0  0  0  0  0  0  0  0  0  0
    3.3869   -1.3808   -0.7969 C   0  0  0  0  0  0  0  0  0  0  0  0
    4.7434   -0.9658   -1.2290 C   0  0  0  0  0  0  0  0  0  0  0  0
    5.0514    0.4065   -1.2593 C   0  0  0  0  0  0  0  0  0  0  0  0
    4.0221    1.3925   -0.8632 C   0  0  0  0  0  0  0  0  0  0  0  0
    4.2859    2.5799   -0.8871 O   0  0  0  0  0  0  0  0  0  0  0  0
    3.0895   -2.5569   -0.7617 O   0  0  0  0  0  0  0  0  0  0  0  0
    5.6468   -1.8627   -1.5786 N   0  0  0  0  0  0  0  0  0  0  0  0
    6.8639   -1.5068   -1.9670 C   0  0  0  0  0  0  0  0  0  0  0  0
    7.2388   -0.1643   -2.0214 C   0  0  0  0  0  0  0  0  0  0  0  0
    6.3200    0.8133   -1.6621 C   0  0  0  0  0  0  0  0  0  0  0  0
    1.4637    3.1153   -1.0675 O   0  0  0  0  0  0  0  0  0  0  0  0
    1.8004    2.5414    1.3455 O   0  0  0  0  0  0  0  0  0  0  0  0
    7.8419   -2.5526   -2.3489 C   0  0  0  0  0  0  0  0  0  0  0  0
    8.9589   -2.2378   -2.7059 O   0  0  0  0  0  0  0  0  0  0  0  0
    7.4917   -3.8520   -2.3000 O   0  0  0  0  0  0  0  0  0  0  0  0
  1  2  2  0      
  2  3  1  0      
  3  4  1  0      
  4  5  2  0      
  5  6  1  0      
  6  1  1  0      
  4  7  1  0      
  7  8  1  0      
  8  9  2  0      
  9 10  1  0      
 10  5  1  0      
 10 11  2  0      
  7 12  2  0      
  8 13  1  0      
 13 14  2  0      
 14 15  1  0      
 15 16  2  0      
 16  9  1  0      
  6 17  2  0      
  6 18  2  0      
 14 19  1  0      
 19 20  2  0      
 19 21  1  0      
M  STY  1   1 SUP
M  SLB  1   1   1
M  SAL   1  3  19  20  21
M  SBL   1  1  21
M  SMT   1 CO2H
M  SBV   1 21   -5.5272    6.3319
M  END
$$$$
