# Supplementary material for: Discovery and Evaluation of Thiazinoquinones as Anti-Protozoal Agents
Source: MDPI journal article supplement (doi:10.3390/md11093472), 2013-09-09
Supplement: s6 [file s6]

marinedrugs-11-03472-s003.mol
  ChemDraw12021317282D

 21 23  0  0  0  0  0  0  0  0999 V2000
   -2.5002    0.4125    0.0000 C   0  0  0  0  0  0  0  0  0  0  0  0
   -2.5002   -0.4125    0.0000 C   0  0  0  0  0  0  0  0  0  0  0  0
   -1.7857   -0.8250    0.0000 N   0  0  0  0  0  0  0  0  0  0  0  0
   -1.0712   -0.4125    0.0000 C   0  0  0  0  0  0  0  0  0  0  0  0
   -1.0712    0.4125    0.0000 C   0  0  0  0  0  0  0  0  0  0  0  0
   -1.7857    0.8250    0.0000 S   0  0  0  0  0  0  0  0  0  0  0  0
   -0.3568   -0.8250    0.0000 C   0  0  0  0  0  0  0  0  0  0  0  0
    0.3577   -0.4125    0.0000 C   0  0  0  0  0  0  0  0  0  0  0  0
    0.3577    0.4125    0.0000 C   0  0  0  0  0  0  0  0  0  0  0  0
   -0.3568    0.8250    0.0000 C   0  0  0  0  0  0  0  0  0  0  0  0
   -0.3568    1.6500    0.0000 O   0  0  0  0  0  0  0  0  0  0  0  0
   -0.3568   -1.6500    0.0000 O   0  0  0  0  0  0  0  0  0  0  0  0
    1.0722   -0.8250    0.0000 N   0  0  0  0  0  0  0  0  0  0  0  0
    1.7867   -0.4125    0.0000 C   0  0  0  0  0  0  0  0  0  0  0  0
    1.7867    0.4125    0.0000 C   0  0  0  0  0  0  0  0  0  0  0  0
    1.0722    0.8250    0.0000 C   0  0  0  0  0  0  0  0  0  0  0  0
   -2.3691    1.4084    0.0000 O   0  0  0  0  0  0  0  0  0  0  0  0
   -1.2023    1.4084    0.0000 O   0  0  0  0  0  0  0  0  0  0  0  0
    2.5002   -1.2375    0.0000 C   0  0  0  0  0  0  0  0  0  0  0  0
    2.5002   -0.4125    0.0000 O   0  0  0  0  0  0  0  0  0  0  0  0
    1.7857   -1.6500    0.0000 O   0  0  0  0  0  0  0  0  0  0  0  0
  1  2  2  0      
  2  3  1  0      
  3  4  1  0      
  4  5  2  0      
  5  6  1  0      
  6  1  1  0      
  4  7  1  0      
  7  8  1  0      
  8  9  2  0      
  9 10  1  0      
 10  5  1  0      
 10 11  2  0      
  7 12  2  0      
  8 13  1  0      
 13 14  2  0      
 14 15  1  0      
 15 16  2  0      
 16  9  1  0      
  6 17  2  0      
  6 18  2  0      
 14 19  1  0      
 19 20  2  0      
 19 21  1  0      
M  STY  1   1 SUP
M  SLB  1   1   1
M  SAL   1  3  19  20  21
M  SBL   1  1  21
M  SMT   1 CO2H
M  SBV   1 21   -5.5272    6.3319
M  END
